# Supplementary material for: Metal coordination polymer derived mesoporous Co3O4nanorods with uniform TiO2coating as advanced anodes for lithium ion batteries
Source: Royal Society of Chemistry journal article supplement (doi:10.1039/c5nr08570e), 2016-01-01
Supplement: c5nr08570e1.pdf [file c5nr08570e1.pdf]

## Metal coordination polymer derived mesoporous $\text{Co}_3\text{O}_4$ nanorods with uniform $\text{TiO}_2$ coating as advanced anodes for lithium ion batteries

Hongbo Geng,<sup>a,b</sup> Huixiang Ang,<sup>b</sup> Xianguang Ding,<sup>c</sup> Huiteng Tan,<sup>b</sup> Guile Guo,<sup>b</sup> Genlong Qu,<sup>a</sup> Yonggang Yang,<sup>a</sup> Junwei Zheng,<sup>a,d</sup> Qingyu Yan<sup>\*b</sup> and Hongwei Gu<sup>\*a</sup>

<sup>a</sup>Key Laboratory of Organic Synthesis of Jiangsu Province, College of Chemistry, Chemical Engineering and Materials Science and Collaborative Innovation Center of Suzhou Nano Science and Technology, Soochow University, Suzhou, 215123, China.

E-mail: hongwei@suda.edu.cn

<sup>b</sup>School of Materials Science and Engineering, Nanyang Technological University, Singapore 639798, Singapore. E-mail: alexyan@ntu.edu.sg

<sup>c</sup>i-Lab and Division of Nanobiomedicine, Suzhou Institute of Nano-tech and Nano-Bionics, Chinese Academy of Sciences, Suzhou, China.

<sup>d</sup>College of Physics, Optoelectronics and Energy, Soochow University, Suzhou, 215006, China.

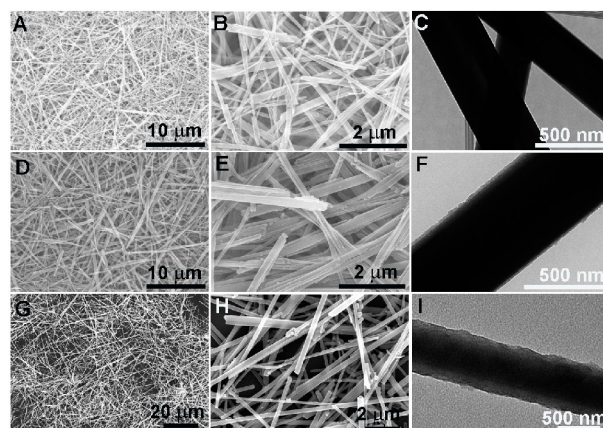

**Fig. S1** SEM and TEM images of Co-NA (A-C), Co-NA@PDA (D-F), Co-NA@PDA@TiO<sub>2</sub> (G-I).

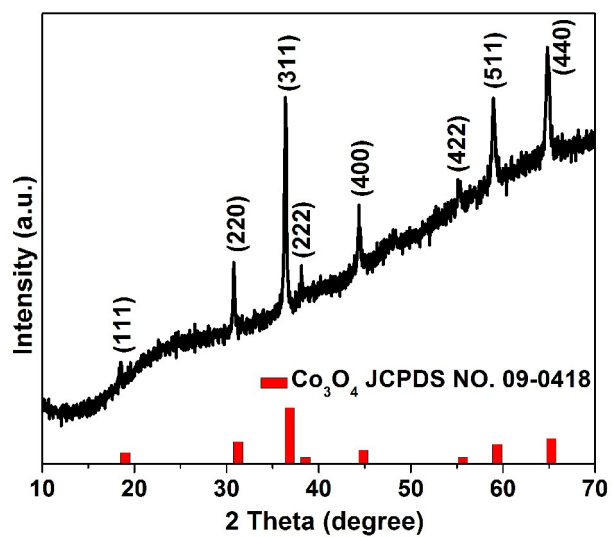

Fig. S2 XRD pattern of the pure  $\text{Co}_3\text{O}_4$ .

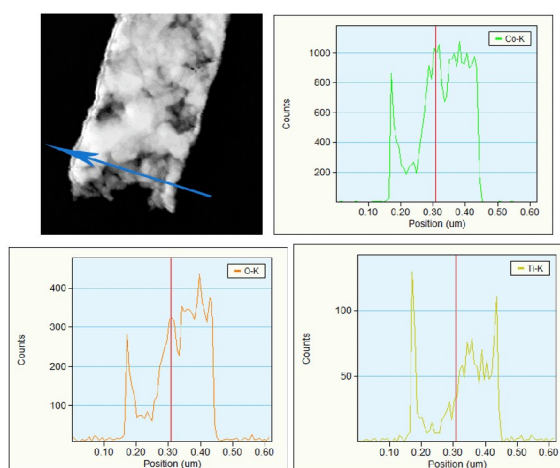

Fig. S3 The SEM image and corresponding EDS line scanning profiles of Co, O and Ti in the  $\text{Co}_3\text{O}_4@\text{TiO}_2$  composite.

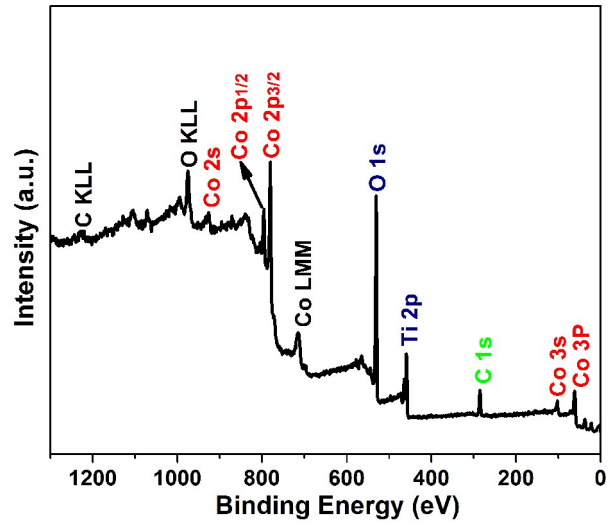

Fig. S4 The XPS survey spectrum of the  $\text{Co}_3\text{O}_4@\text{TiO}_2$  yolk-shell nanorods.

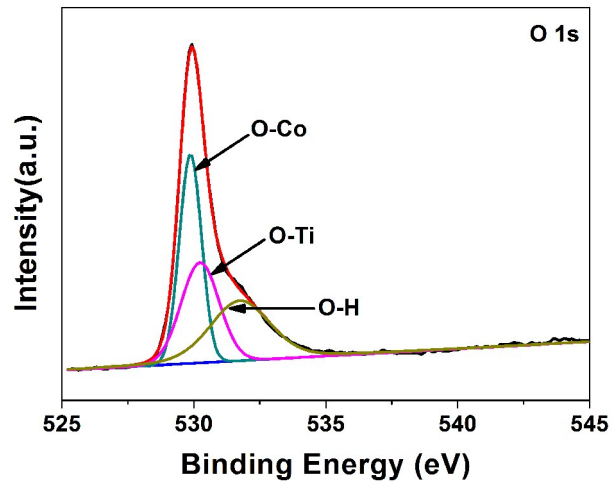

Fig. S5 The XPS high-resolution spectra of the O 1s of the  $\text{Co}_3\text{O}_4@\text{TiO}_2$  yolk-shell nanorods.

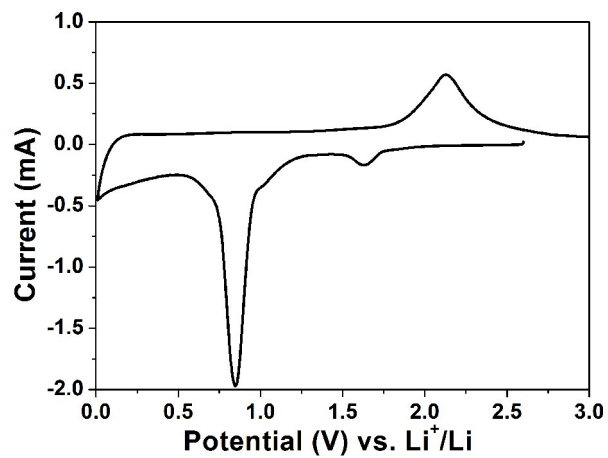

Fig. S6 Cyclic voltammogram (CV) profile of the  $\text{Co}_3\text{O}_4@\text{TiO}_2$  yolk-shell nanorods.

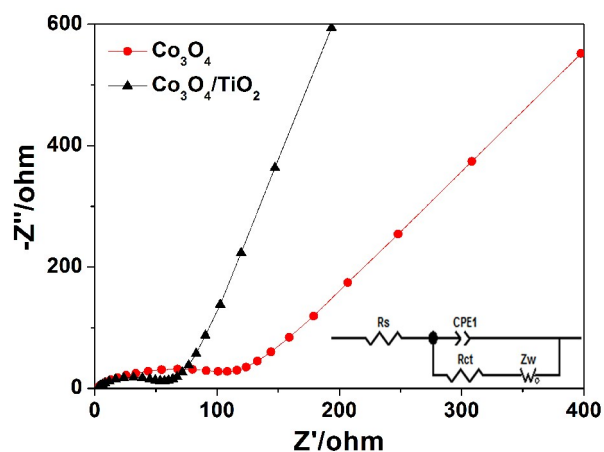

**Fig. S7** The electrochemical impedance spectroscopy plots for the  $\text{Co}_3\text{O}_4$  and the  $\text{Co}_3\text{O}_4/\text{TiO}_2$  electrodes before cycling and the corresponding fitted equivalent circuit model (inset).

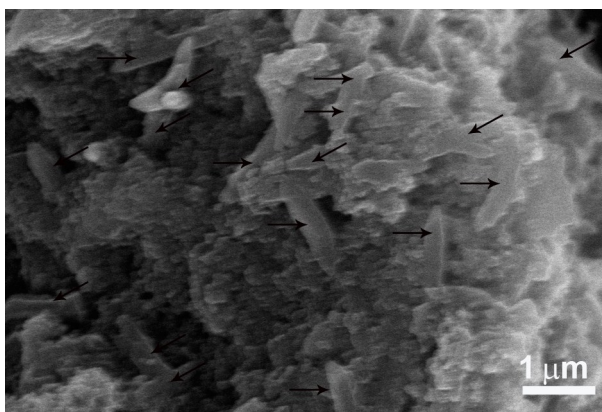

**Fig. S8** The SEM images of the  $\text{Co}_3\text{O}_4/\text{TiO}_2$  electrode after 100 cycles at the current density of  $200 \text{ mA g}^{-1}$ .

**Table S1.** Comparison of specific capacities of the current  $\text{Co}_3\text{O}_4/\text{TiO}_2$  core-shell electrode with other hybrid electrode materials reported in literature.

| Materials                                                               | Current density   | Cycle number | Specific capacity<br>( $\text{mA h g}^{-1}$ ) | Ref. |
|-------------------------------------------------------------------------|-------------------|--------------|-----------------------------------------------|------|
| $\text{Fe}_3\text{O}_4$ nanoparticle-decorated $\text{TiO}_2$ nanofiber | 100 $\text{mA/g}$ | 100          | about 454 $\text{mA h g}^{-1}$                | 1    |
| Graphene wrapped $\text{TiO}_2/\text{Co}_3\text{O}_4$ nanobelt          | 100 $\text{mA/g}$ | 100          | about 437 $\text{mA h g}^{-1}$                | 2    |
| $\text{Co}_3\text{O}_4/\text{TiO}_2$ hierarchical heterostructures      | 200 $\text{mA/g}$ | 100          | about 600 $\text{mA h g}^{-1}$                | 3    |
| $\text{CuO}/\text{TiO}_2$ nanocables                                    | 60 $\text{mA/g}$  | 50           | about 663 $\text{mA h g}^{-1}$                | 4    |
| Sandwich-like $\text{Co}_3\text{O}_4/\text{TiO}_2$                      | 100 $\text{mA/g}$ | 100          | about 800 $\text{mA h g}^{-1}$                | 5    |

|                                                                                                       |           |     |                                |               |
|-------------------------------------------------------------------------------------------------------|-----------|-----|--------------------------------|---------------|
| composite                                                                                             |           |     |                                |               |
| Mn <sub>2</sub> O <sub>3</sub> @TiO <sub>2</sub> cube                                                 | 100 mA/g  | 30  | about 449 mA h g <sup>-1</sup> | 6             |
| α-Fe <sub>2</sub> O <sub>3</sub> @SnO <sub>2</sub> nanorattles                                        | 200 mA/g  | 30  | about 419 mA h g <sup>-1</sup> | 7             |
| Graphene-based TiO <sub>2</sub> /SnO <sub>2</sub> nanosheet                                           | 160 mA/g  | 100 | about 600 mA h g <sup>-1</sup> | 8             |
| SnO <sub>2</sub> /TiN nanoparticles                                                                   | 78.1 mA/g | 50  | about 404 mA h g <sup>-1</sup> | 9             |
| Carbon coated TiO <sub>2</sub> nanosheets decorated with Fe <sub>3</sub> O <sub>4</sub> nanoparticles | 200 mA/g  | 20  | about 742 mA h g <sup>-1</sup> | 10            |
| TiO <sub>2</sub> coated Mn <sub>3</sub> O <sub>4</sub> nanorods                                       | 200 mA/g  | 20  | about 690 mA h g <sup>-1</sup> | 11            |
| NiO/TiO <sub>2</sub> nanosheets                                                                       | 200 mA/g  | 100 | about 541 mA h g <sup>-1</sup> | 12            |
| Co <sub>3</sub> O <sub>4</sub> @TiO <sub>2</sub> core-shell nanorods                                  | 200 mA/g  | 100 | about 803 mA h g <sup>-1</sup> | Current study |

### References:

1. H. G. Wang, G. S. Wang, S. Yuan, D. L. Ma, Y. Li and Y. Zhang, *Nano Res.*, 2015, **8**, 1659-1668.
2. Y. S. Luo, J. S. Luo, W. W. Zhou, X. Y. Qi, H. Zhang, D. Y. W. Yu, C. M. Li, H. J. Fan and T. Yu, *J. Mater. Chem. A*, 2013, **1**, 273-281.
3. H. G. Wang, D. L. Ma, X. L. Huang, Y. Huang and X. B. Zhang, *Sci. Rep.*, 2012, **2**, 701.
4. A. Li, H. H. Song, X. H. Chen, J. S. Zhou and Z. K. Ma, *ACS Appl. Mater. Interfaces*, 2015, **7**, 22372-22379.
5. W. T. Li, K. N. Shang, Y. M. Liu, Y. F. Zhu, R. H. Zeng, L. Z. Zhao, Y. W. Wu, Lin Li, Y. H. Chu, J. H. Liang and G. Liu, *Electrochim. Acta*, 2015, **174**, 985-991.

6. X. Q. Chen, H. B. Lin, X. W. Zheng, X. Cai, P. Xia, Y. M. Zhu, X. P. Li and W. S. Li, *J. Mater. Chem. A*, 2015, **3**, 18198-18206.
7. J. S. Chen, C. M. Li, W. W. Zhou, Q. Y. Yan, L. A. Archer and X. W. Lou, *Nanoscale*, 2009, **1**, 280-285.
8. Y. P. Tang, D. Q. Wu, S. Chen, F. Zhang, J. P. Jia and X. L. Feng, *Energy Environ. Sci.*, 2013, **6**, 2447-2451.
9. M. M. Liu, X. W. Li, H. Ming, J. Adkins, X. M. Zhao, L. L. Su, Q. Zhou and J. W. Zheng, *New J. Chem.*, 2013, **37**, 2096-2102.
10. H. Xu, X. D. Zhu, K. N. Sun, Y. T. Liu and X. M. Xie, *Adv. Mater. Interfaces*, 2015, **2**, 1500239.
11. N. N. Wang, J. Yue, L. Chen, Y. T. Qian and J. Yang, *ACS Appl. Mater. Interfaces*, 2015, **7**, 10348-10355.
12. G. J. Li, H. Hu, Q. C. Zhu and Y. Yu, *RSC Adv.*, 2015, **5**, 101247-101256.
